# Supplementary material for: Zinc-methacrylate passivation enables an efficient and stable perovskite nanocrystal-polymer composite for LED applications
Source: Royal Society of Chemistry journal article supplement (doi:10.1039/d0tc05425a), 2021-01-01
Supplement: d0tc05425a1.pdf [file d0tc05425a1.pdf]

## Electronic Supplementary Information

### Zinc-Methacrylate Passivation Enables Efficient and Stable Perovskite Nanocrystals-Polymer Composite for LED Application

Dan Li, Yixuan Liu, Shuangshuang Shi, Yanjun Li, Chong Geng,\* Shu Xu\*

*Tianjin Key Laboratory of Electronic Materials and Devices, School of Electronics and Information Engineering, Hebei University of Technology, 5340 Xiping Road, Tianjin 300401, P. R. China.*

*\* Corresponding authors. E-mail: gengchong@hebut.edu.cn; shu.xu@hebut.edu.cn*

#### Characterization

##### 1. TEM images of pristine and modified PNCs.

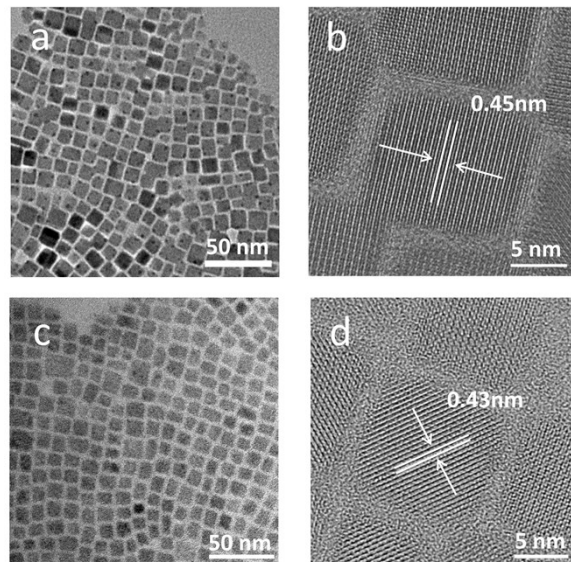

**Fig. S1** TEM image (a) and HRTEM image (b) of ZnMA-TOPO modified PNCs. TEM image (c) and HRTEM image (d) of pristine PNCs.

## 2. Transmittance of the pristine and modified PNCs.

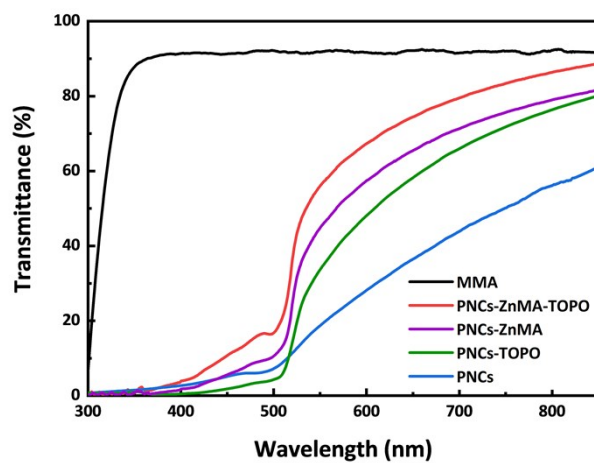

**Fig. S2** Transmittances of the solution of MMA, PNCs-ZnMA-TOPO, PNCs-ZnMA, PNCs-TOPO and PNCs.

**3. Photos of pristine PNCs, PNCs-ZnMA-TOPO, PNCs-ZnMA and PNCs-TOPO after injection of ethanol.**

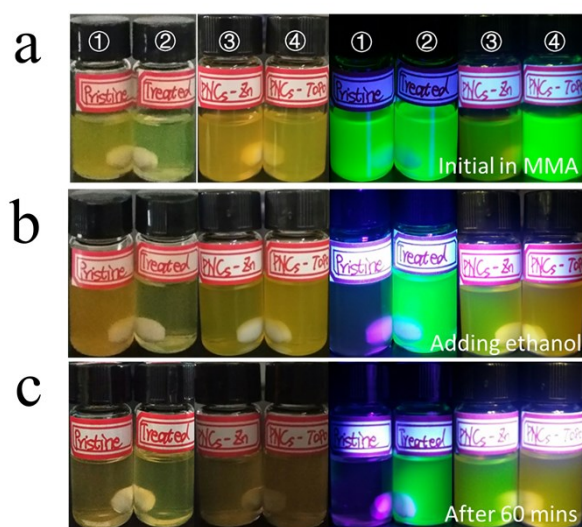

**Fig. S3** Photos of the PNCs, PNCs-ZnMA-TOPO, PNCs-ZnMA and IPNCs-TOPO at (a) initial state, (b) after injection of ethanol and (c) stirring for 60 mins under room light (left) and UV-lamp (right).

4. PL spectra of pristine PNCs, PNCs-ZnMA-TOPO, PNCs-ZnMA and PNCs-TOPO after injection of ethanol.

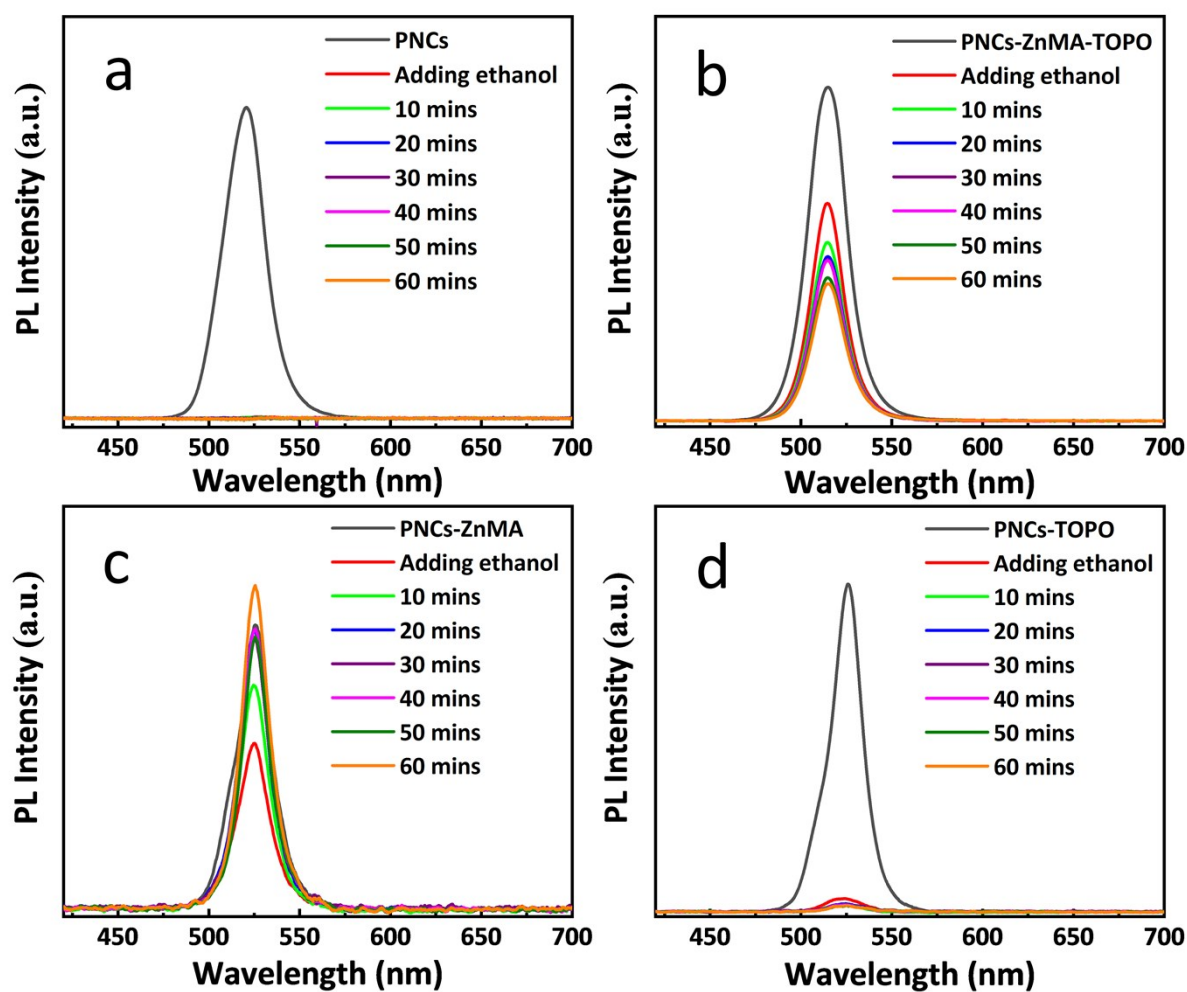

Fig. S4 PL spectra of the (a) PNCs, (b) PNCs-ZnMA-TOPO, (c) PNCs-ZnMA, (d) IPNCs-TOPO at initial state, after injection of ethanol and stirring for 60 mins. The initial PL spectra of the samples have been normalized.

5. FIIR spectra of PNCs and PNCs-ZnMA-TOPO after exposure to ethanol.

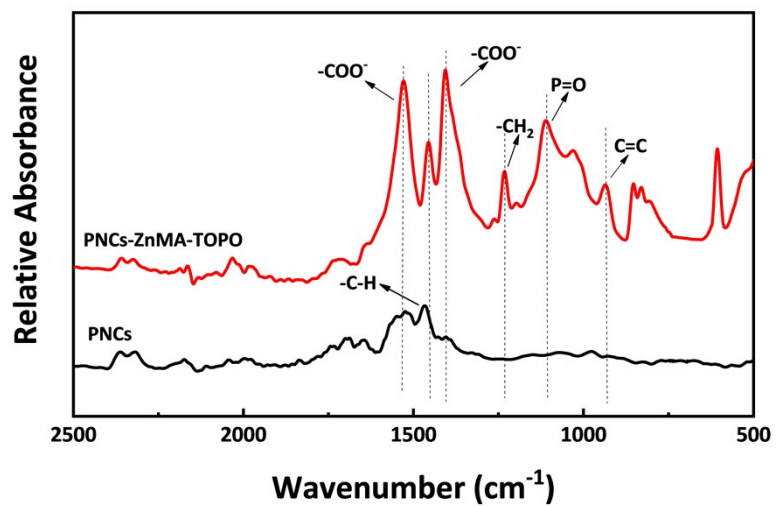

Fig. S5 FIIR spectra of PNCs and PNCs-ZnMA-TOPO after exposure to ethanol.

## 6. PL spectra of the PNCs-ZnMA-TOPO after injection of different alcohols.

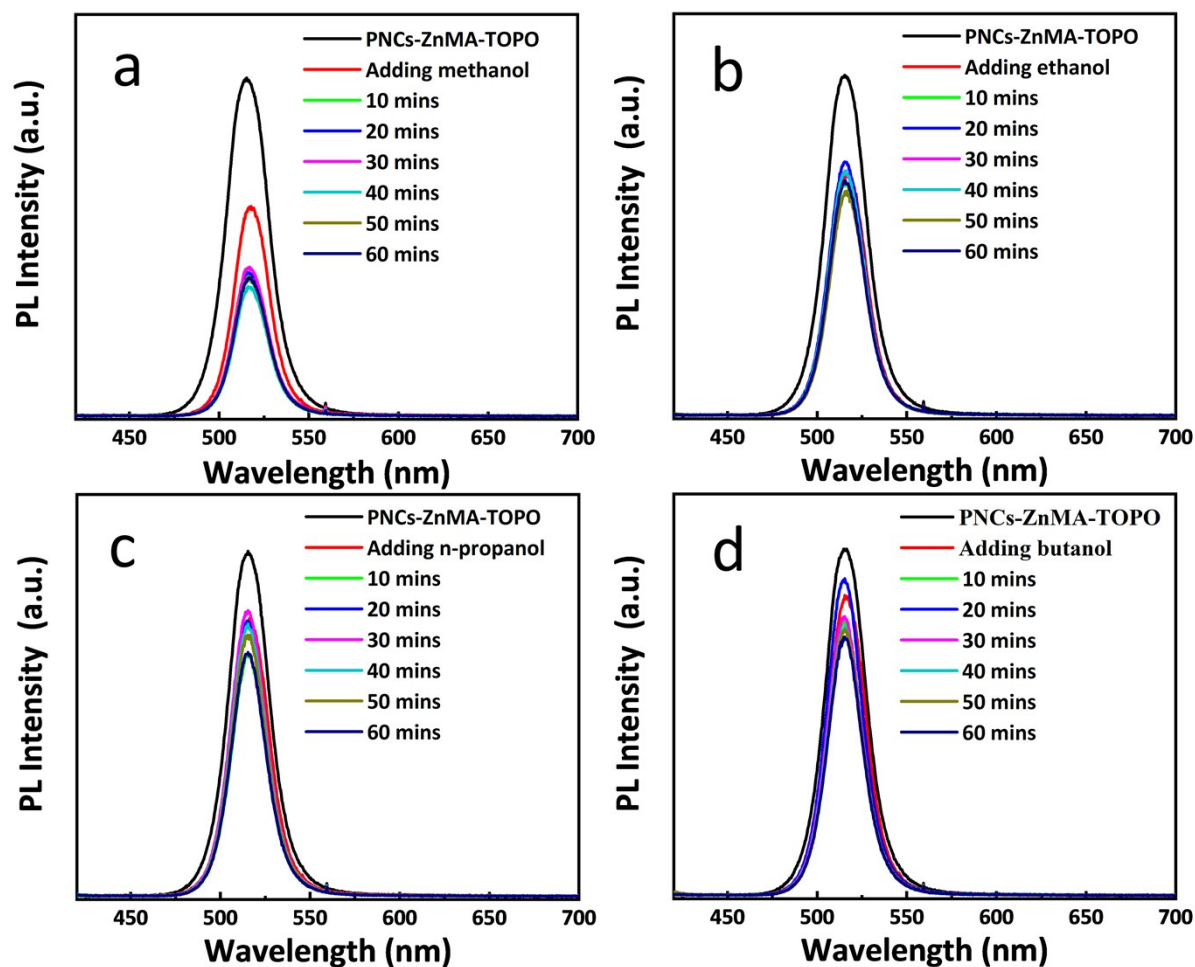

**Fig. S6** The PL spectra of the PNCs-ZnMA-TOPO at initial state, after injection of (a) methanol, (b) ethanol, (c) n-propanol, (d) butanol and stirring for 1 hour. The initial PL spectra of the samples have been normalized.

## 7. XPS spectra of the pristine PNCs and modified PNCs.

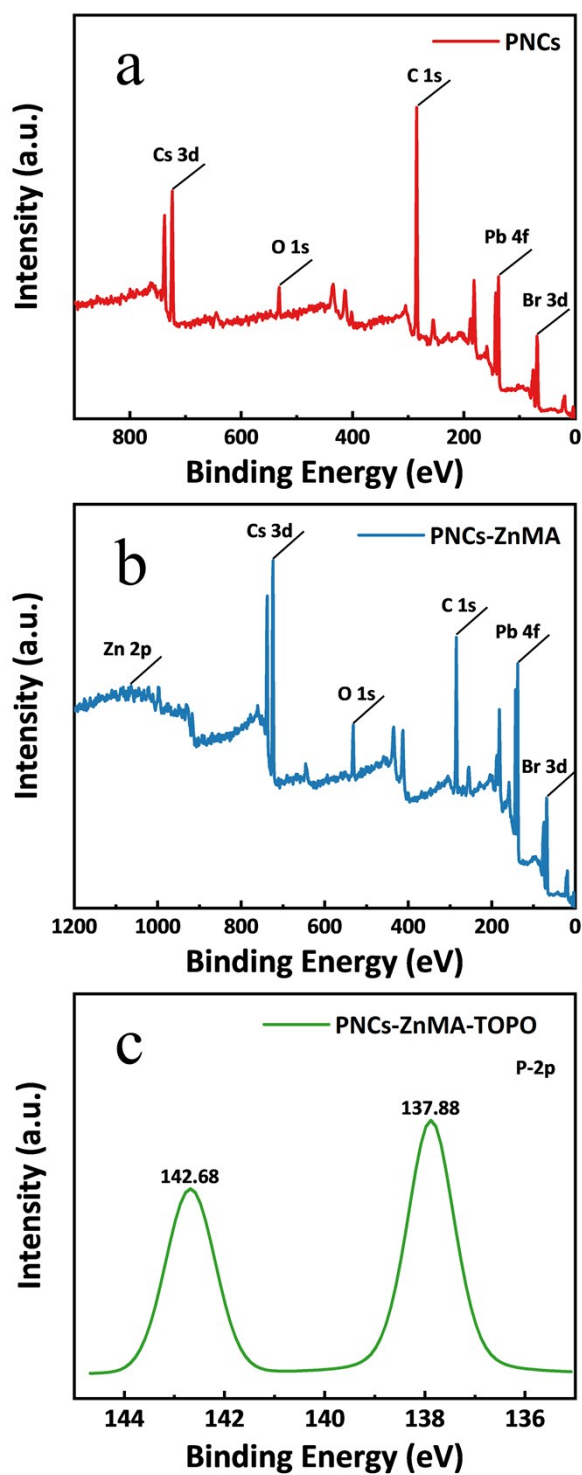

**Fig. S7** XPS survey spectrum of (a) pristine PNCs and (b) PNCs-ZnMA. (c) High-resolution XPS of P-2p chemical state of PNCs-ZnMA-TOPO.

8. FIIR spectra of PNCs-ZnMA-TOPO /PMMA and PNCs-ZnMA-TOPO.

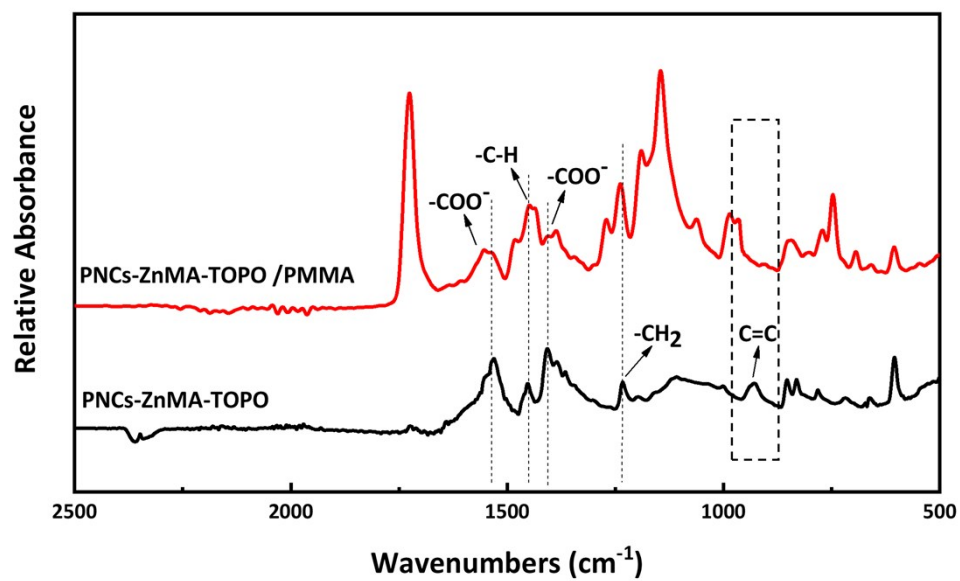

Fig. S8 FIIR spectra of PNCs-ZnMA-TOPO /PMMA and PNCs-ZnMA-TOPO.



### 9. Photostability test result of the PNCs-ZnMA-TOPO and pristine PNCs solution.

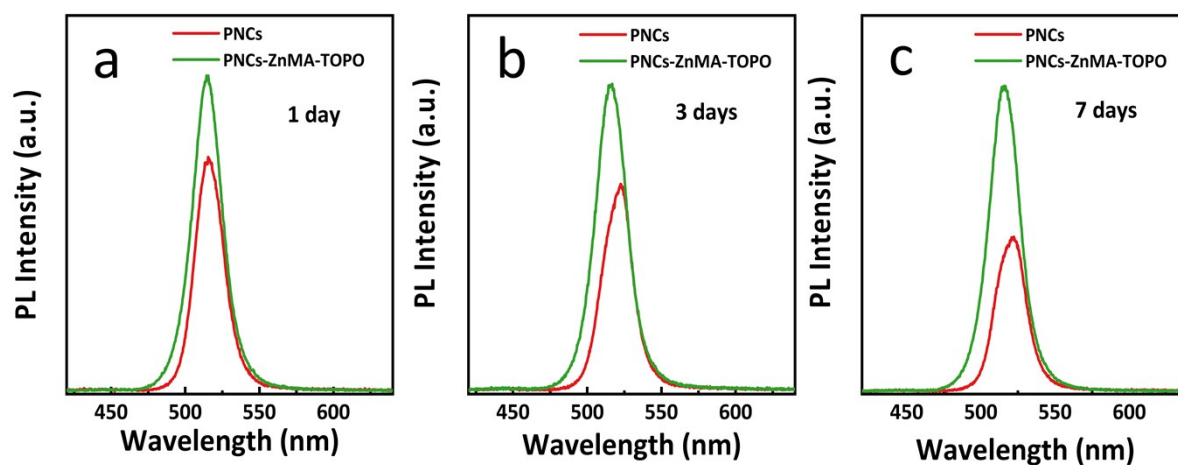

Fig. S9 The PL spectra of the PNCs and PNCs-ZnMA-TOPO solution in (a) 1 day, (b) 3 days, (c) 7 days in daily light.

### 10. Thermal stability of the PNCs and PNCs-ZnMA-TOPO thin films after heating-cooling cycles between 100 °C and 25 °C.

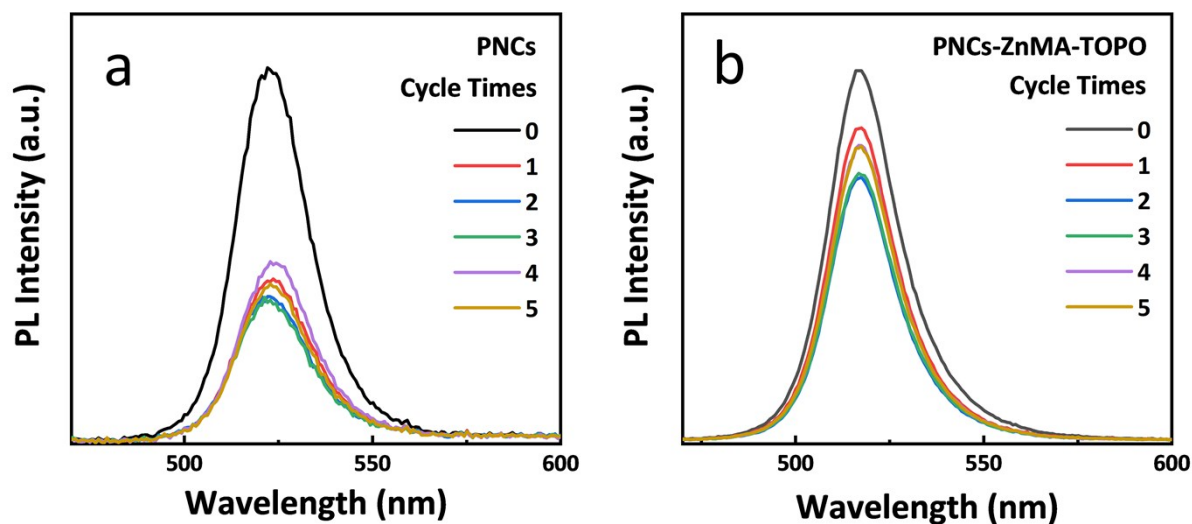

Fig. S10 PL spectra of the (a) pristine PNCs and (b) PNCs-ZnMA-TOPO thin films after heating-cooling cycles between 100 and 25 °C.
